# Supplementary material
Source: PubMed Central journal article supplement (PMC7361092)
Supplement: mmc1.pdf [file mmc1.pdf]

## Supplementary material

### **Spread of SARS-CoV-2 through Latin America and the Caribbean region: a look from its economic conditions, climate and air pollution indicators**

Tomás R. Bolaño-Ortiz <sup>a,b,\*</sup>, Yiniva Camargo-Caicedo <sup>c</sup>, Salvador Enrique Puliafito <sup>a,b</sup>, María Florencia Ruggeri <sup>d</sup>, Sindy Bolaño-Díaz <sup>c</sup>, Romina Pascual-Flores <sup>a,b</sup>, Jorge Saturno <sup>e</sup>, Sergio Ibarra-Espinosa <sup>f</sup>, Olga L. Mayol-Bracero <sup>g</sup>, Elvis Torres-Delgado <sup>g</sup>, Francisco Cereceda-Balic <sup>d,h</sup>

<sup>a</sup> Mendoza Regional Faculty – National Technological University (FRM-UTN). 273 Coronel Rodríguez St. 5050 Mendoza, Argentina

<sup>b</sup> National Scientific and Technical Research Council (CONICET), Mendoza, Argentina

<sup>c</sup> Environmental Systems Modeling Research Group (GIMSA), University of Magdalena, Santa Marta, Colombia

<sup>d</sup> Center for Environmental Technologies – Universidad Técnica Federico Santa María (CETAM-UTFSM), Valparaíso, Chile

<sup>e</sup> Independent researcher, Braunschweig, Germany

<sup>f</sup> University of São Paulo (USP), São Paulo, Brazil

<sup>g</sup> Department of Environmental Science, University of Puerto Rico, San Juan, Puerto Rico

<sup>h</sup> Department of Chemistry, Universidad Técnica Federico Santa María (UTFSM), Valparaíso, Chile

\*tomas.bolano@frm.utn.edu.ar

**Table S1.** Total cases of COVID-19 for each city and its total in each country where it is located. In addition, the fraction that each city has in comparison to its country. The last column shows the infection rate by COVID-19 of each city.

| <b>Cities analyzed</b> | <b>Total cases</b> | <b>Total cases nationwide</b> | <b>Fraction of total cases nationwide in each city</b> | <b>Infection rate by covid-19 in each city (per 100,000 inhabitants)</b> |
|------------------------|--------------------|-------------------------------|--------------------------------------------------------|--------------------------------------------------------------------------|
| Mexico City            | 24429              | 84627                         | 28.87                                                  | 275.88                                                                   |
| Santo Domingo          | 4489               | 16908                         | 26.55                                                  | 173.92                                                                   |
| San Juan               | 1070               | 3718                          | 28.78                                                  | 43.18                                                                    |
| Bogotá                 | 10388              | 26688                         | 38.92                                                  | 140.13                                                                   |
| Guayaquil              | 9762               | 38571                         | 25.31                                                  | 367.82                                                                   |
| Manaus                 | 18293              | 465166                        | 3.93                                                   | 839.13                                                                   |
| Lima                   | 99050              | 148285                        | 66.80                                                  | 1023.88                                                                  |
| São Paulo              | 60131              | 465166                        | 12.93                                                  | 493.85                                                                   |
| Santiago               | 80504              | 94858                         | 84.87                                                  | 1286.62                                                                  |
| Buenos Aires           | 8242               | 14702                         | 56.06                                                  | 269.08                                                                   |

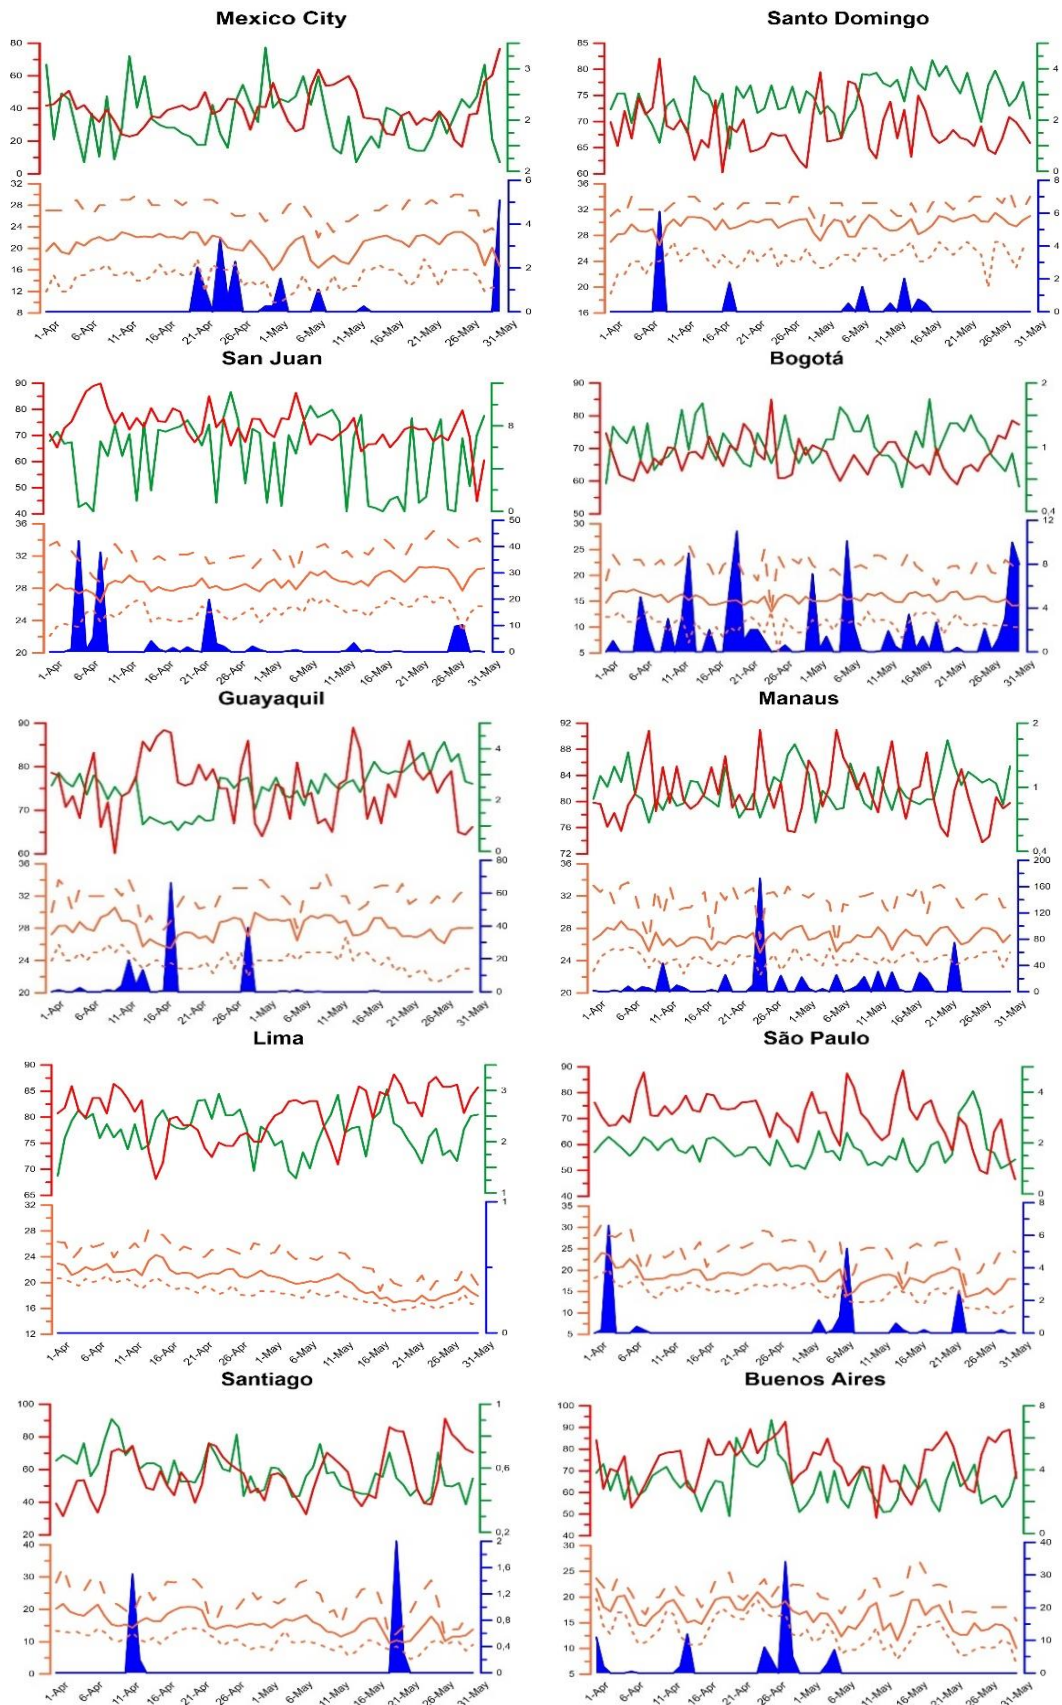

**Fig. S1.** Daily variation of the analyzed climate indicators over each city of Latin America and the Caribbean. Line colors represent, red: relative humidity (%); green: wind speed (m/s); blue: rainfall (mm); solid orange: average temperature (°C); short discontinuous orange: minimum temperature (°C); and long discontinuous orange: maximum temperature (°C).

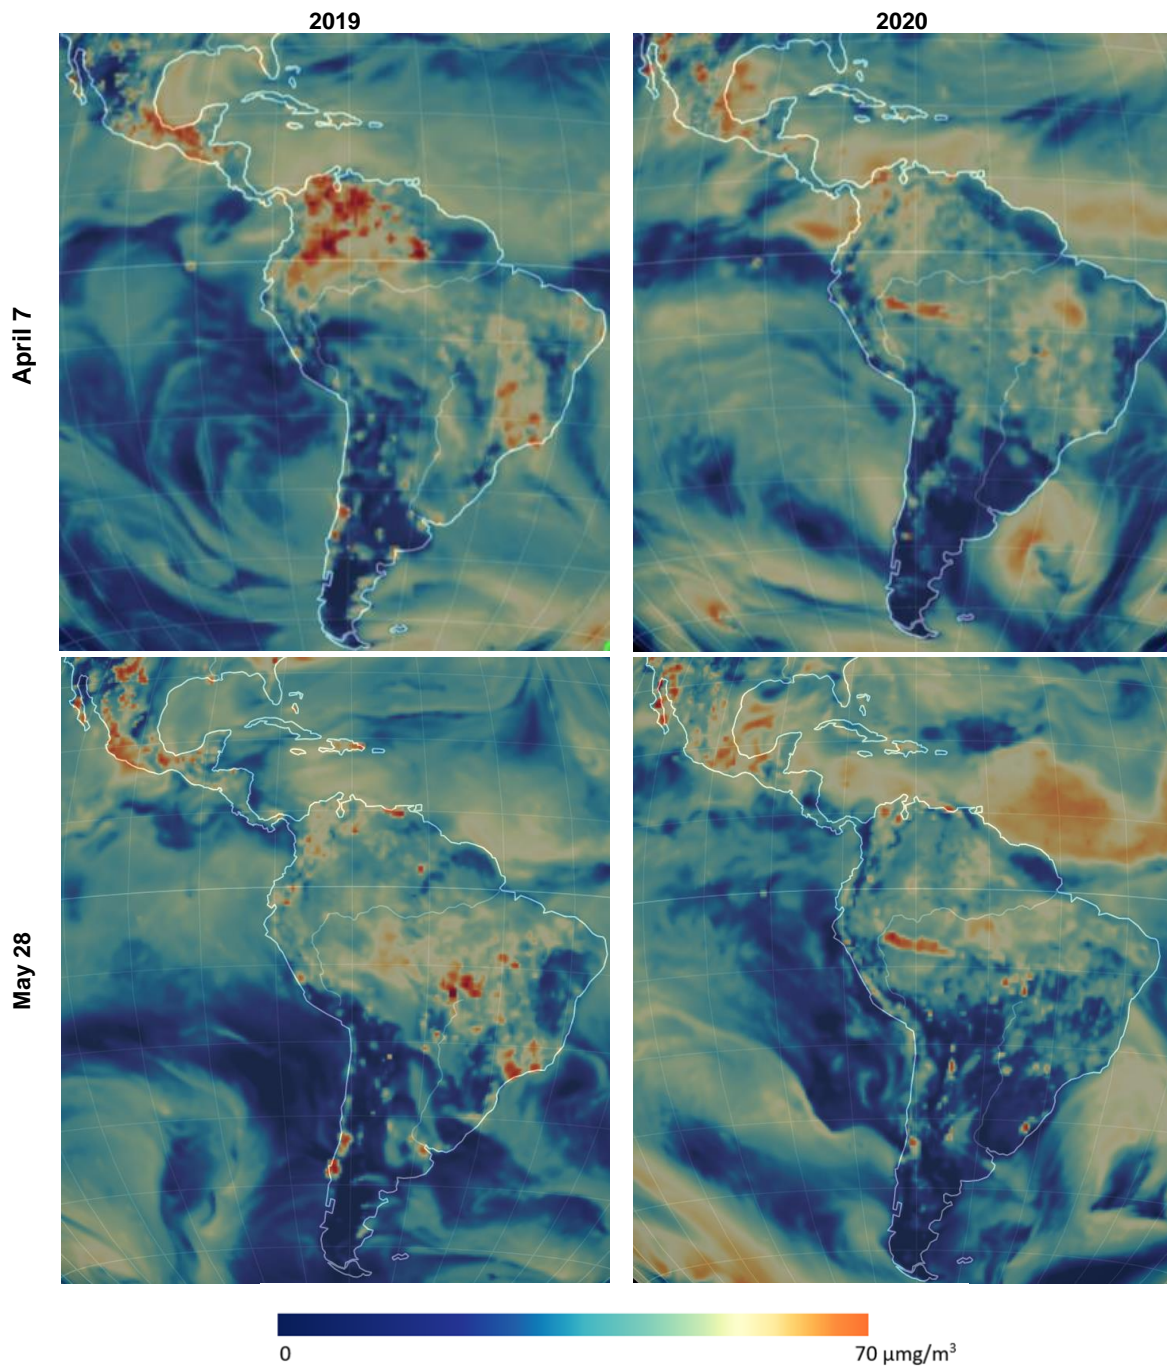

**Fig. S2.** Satellite images obtained on April 7 and on May 28 (2019 and 2020), showing PM<sub>10</sub> levels over Latin America and the Caribbean (LAC) region. Source: Earth (CAMS/Copernicus/European Commission + ECMWF) (Copernicus Earth, 2020).



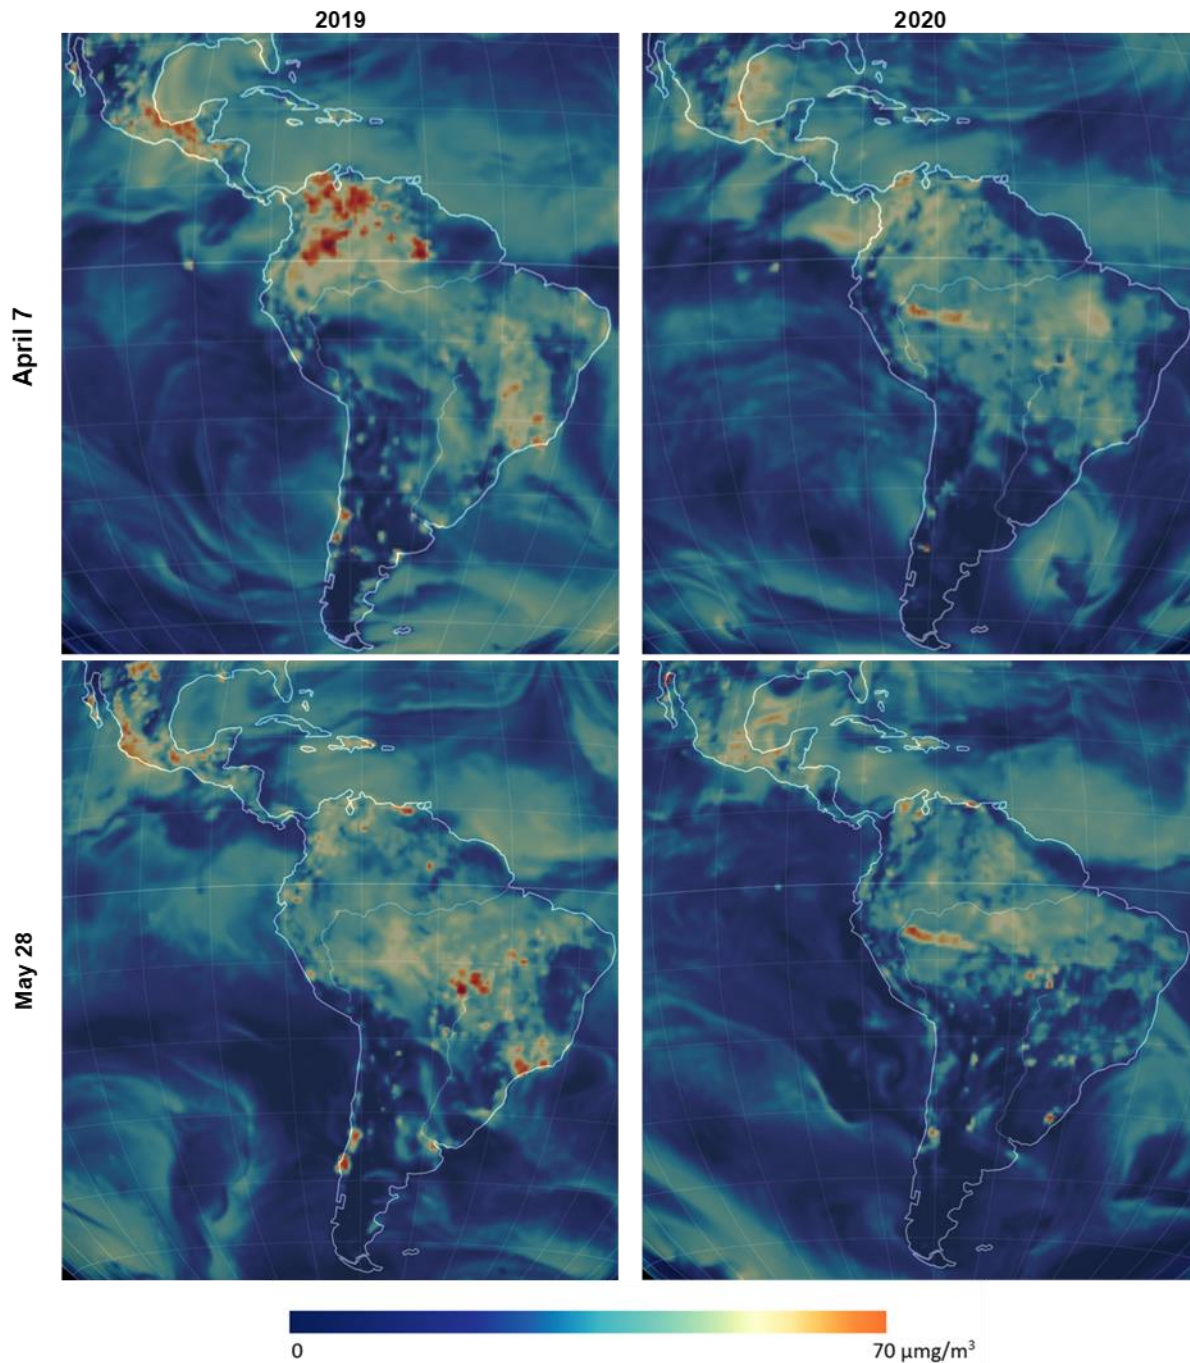

**Fig. S3.** Satellite images obtained on April 7 and on May 28 (2019 and 2020), showing  $PM_{2.5}$  levels over Latin America and the Caribbean (LAC) region. Source: Earth (CAMS/Copernicus/European Commission + ECMWF) (Copernicus Earth, 2020).

Fig S2 and Fig S3 show the levels observed for the same day from 2019 and 2020 for  $PM_{10}$  and  $PM_{2.5}$ , respectively. By 2020, lower snow levels were observed and related to the pandemic lockdowns established in the different LAC countries. These observations are consistent with previous studies carried out during the lockdown measures established in São Paulo and Rio de Janeiro in Brazil (Dantas et al. 2020; Nakada et al. 2020).

**Table S2.** Empirical results of the Pearson correlation coefficient ( $r$ ) between socioeconomic variables and contagion rate for COVID-19 in LAC cities analyzed.

| <b>Socioeconomic variables</b> | <b><math>r</math></b> | <b><math>p</math> value</b> | <b>Confidence interval (%)</b> |
|--------------------------------|-----------------------|-----------------------------|--------------------------------|
| Gini index                     | 0.51                  | 0.1354                      | 86.5                           |
| Urban poverty rate*            | -0.77                 | 0.0149                      | 98.5                           |
| Urban extreme poverty rate*    | -0.79                 | 0.0112                      | 98.9                           |

\*Correlation for poverty and extreme poverty does not consider the city of San Juan (Puerto Rico), because ELAC did not report its data ECLAC, 2020.

## References

Copernicus Earth, 2020. An animated map of global wind and weather. in <http://earth.nullschool.net> (accessed 6.5.20).

ECLAC, 2020. CEPALSTAT: Databases and Statistical Publications [WWW Document]. URL <https://estadisticas.cepal.org/cepalstat/perfilesNacionales.html?idioma=english> (accessed 6.28.20).

Dantas, G., Siciliano, B., França, B.B., da Silva, C.M., Arbilla, G., 2020. The impact of COVID-19 partial lockdown on the air quality of the city of Rio de Janeiro, Brazil. *Sci. Total Environ.* <https://doi.org/10.1016/j.scitotenv.2020.139085>

Nakada, L.Y.K., Urban, R.C., 2020. COVID-19 pandemic: Impacts on the air quality during the partial lockdown in São Paulo state, Brazil. *Sci. Total Environ.* 139087. <https://doi.org/10.1016/J.SCITOTENV.2020.139087>
